# Supplementary material
Source: PubMed Central journal article supplement (PMC5026259)
Supplement: supp_msw143_Supplementary_MBE.pdf [file supp_msw143_Supplementary_MBE.pdf]

Supplementary Materials for

**Divergent Ah receptor ligand selectivity during hominin evolution**

Troy D. Hubbard, Iain A. Murray, William H. Bisson, Alexis P. Sullivan, Aswathy Sebastian, George H. Perry, Nina G. Jablonski and Gary H. Perdew\*

\*Corresponding author. E-mail: [ghp2@psu.edu](mailto:ghp2@psu.edu)

**This PDF file includes:**

Supplementary tables 1 and 2

Supplementary figure 1, 2, 3, 4 and 5.

Supplementary Table 1. Exome SNPs fixed for a derived allele in humans and the ancestral allele in Neandertals and Denisovans

| Synonymous SNPs |                |             |                 | Nonsynonymous SNPs |                |             |                 |       |      |          |       |
|-----------------|----------------|-------------|-----------------|--------------------|----------------|-------------|-----------------|-------|------|----------|-------|
| Gene            | Chr:Pos        | RS ID       | Ref/Alt Alleles | Gene               | Chr:Pos        | RS ID       | Ref/Alt Alleles | dbSNP | MAF  | dbSN P % |       |
| FHL3            | chr1:38464668  | .           | A/G             | TTC22              | chr1:55248120  | rs61733130  | T/C             | C     | 0.02 | 14       | 2.84  |
| RLF             | chr1:40702570  | rs16827078  | C/T             | BCAR3              | chr1:94048153  | rs12062278  | T/C             | C     | 0.05 | 26       | 5.31  |
| SLC2A1          | chr1:43394612  | rs2228490   | T/C             | SPAG17             | chr1:118558632 | .           | T/C             | .     | .    | .        | .     |
| MUTYH           | chr1:45796899  | rs74318065  | C/G             | SPAG17             | chr1:118634297 | .           | A/C             | .     | .    | .        | .     |
| TTC4            | chr1:55188382  | rs11550481  | C/T             | RPTN               | chr1:152128838 | rs75497821  | T/A             | A     | 0.01 | 79       | 1.58  |
| TLL7            | chr1:84387062  | .           | T/C             | SLC27A3            | chr1:153751869 | .           | G/T             | .     | .    | .        | .     |
| BCAR3           | chr1:94032969  | rs34294233  | C/G             | CR1L               | chr1:207868022 | rs72468038  | G/T             | T     | 0.03 | 19       | 3.95  |
| VCAM1           | chr1:101196855 | .           | C/T             | USH2A              | chr1:215808022 | rs41308435  | T/C             | C     | 0.02 | 12       | 2.44  |
| SPAG17          | chr1:118558666 | .           | G/A             | USH2A              | chr1:215821939 | rs41315587  | C/T             | T     | 0.03 | 18       | 3.67  |
| ARHGEF2         | chr1:155934849 | .           | A/G             | ABHD1              | chr2:27351355  | rs34127901  | C/A             | A     | 0.01 | 67       | 1.34  |
| FCRL3           | chr1:157665381 | .           | A/G             | MOGS               | chr2:74689671  | rs34838944  | G/C             | C     | 0.00 | 48       | 0.96  |
| CD1D            | chr1:158153772 | .           | G/A             | TTC31              | chr2:74719816  | rs111415294 | G/A             | A     | 0.00 | 46       | 0.92  |
| AIM2            | chr1:159043041 | rs34479821  | C/T             | COL6A3             | chr2:238283472 | rs11896521  | T/G             | G     | 0.07 | 37       | 7.49  |
| KCTD3           | chr1:215792535 | rs75651965  | C/G             | ZNF502             | chr3:44762392  | rs6798400   | T/C             | C     | 0.03 | 15       | 3.12  |
| USH2A           | chr1:215821971 | rs41304083  | G/A             | KIF15              | chr3:44843440  | rs72875737  | A/G             | G     | 0.01 | 78       | 1.56  |
| HLX             | chr1:221054648 | rs146391223 | A/C             | CDCP1              | chr3:45130609  | rs35428731  | G/A             | A     | 0.02 | 14       | 2.86  |
| RAD51A          | chr2:17699275  | rs114644105 | G/T             | DNAH1              | chr3:52381865  | rs61734653  | A/G             | G     | 0.00 | 39       | 0.78  |
| PAIP2B          | chr2:71429687  | rs13001756  | C/G             | DNAH1              | chr3:52417991  | rs61749019  | G/A             | A     | 0.00 | 39       | 0.78  |
| MRPS9           | chr2:105705507 | rs11538198  | C/T             | CD86               | chr3:121825197 | rs2681417   | G/A             | G     | 0.13 | 66       | 13.2  |
| TTN             | chr2:179500790 | rs55847232  | A/G             | TMCC1              | chr3:129546729 | rs784689    | T/C             | T     | 0.03 | 17       | 3.47  |
| UNC80           | chr2:210705279 | rs116304707 | G/A             | SLC34A2            | chr4:25673231  | rs112461275 | T/G             | G     | 0.01 | 58       | 1.16  |
| UNC80           | chr2:210818971 | rs16843977  | G/A             | GPRIN3             | chr4:90169025  | rs17015286  | C/T             | T     | 0.05 | 29       | 5.97  |
| FARSB           | chr2:223488419 | rs143154293 | G/T             | FGB                | chr4:155491759 | rs4220      | G/A             | A     | 0.15 | 76       | 15.34 |
| IQCA1           | chr2:237396748 | rs61754936  | A/C             | DMXL1              | chr5:118485238 | rs112912947 | G/C             | C     | 0.02 | 10       | 2.18  |
| PPARG           | chr3:12475497  | rs41516544  | A/G             | PPIC               | chr5:122364538 | rs34341374  | T/C             | C     | 0.03 | 15       | 3.06  |
| Synonymous SNPs |                |             |                 | Nonsynonymous SNPs |                |             |                 |       |      |          |       |
| Gene            | Chr:Pos        | RS ID       | Ref/Alt Alleles | Gene               | Chr:Pos        | RS ID       | Ref/Alt Alleles | dbSNP | MAF  | dbSN P % |       |
| ZNF35           | chr3:44700845  | rs115467258 | G/A             | ZNF292             | chr6:87971068  | rs114321262 | T/C             | C     | 0.00 | 28       | 0.56  |
| QARS            | chr3:49136666  | rs113144521 | T/C             | ZBTB24             | chr6:109802500 | .           | C/G             | .     | .    | .        | .     |

|         |                    |                 |     |         |                     |                 |     |   |      |    |       |
|---------|--------------------|-----------------|-----|---------|---------------------|-----------------|-----|---|------|----|-------|
| PRKCD   | chr3:53223<br>927  | rs10758<br>65   | C/G | PLEK    | chr6:15116<br>1086  | rs17080<br>410  | T/C | C | 0.04 | 20 | 4.05  |
| IMPG2   | chr3:10096<br>3267 | rs35648<br>234  | A/G | HG1     | chr6:15939<br>8700  | rs37569<br>87   | C/T | = | 0.21 | 10 | 21.25 |
| TNIK    | chr3:17084<br>3782 | rs13074<br>171  | C/A | RSPH3   | chr7:74930<br>97    | rs17167<br>927  | C/G | T | 0.06 | 32 | 6.47  |
| POLN    | chr4:21299<br>05   | .               | C/T | COL28A1 | .                   | .               | T/C | G | 0.06 | 32 | 6.47  |
| AFAP1   | chr4:78736<br>95   | rs62636<br>597  | T/C | AHR     | chr7:17375<br>392   | .               | T/C | = | 0.04 | 20 | 4.05  |
| BOD1L   | chr4:13603<br>037  | .               | T/C | DNAH11  | chr7:21892<br>230   | .               | T/C | T | 0.06 | 34 | 6.89  |
| LAP3    | chr4:17609<br>125  | rs62641<br>702  | A/G | SCRN1   | chr7:29980<br>471   | rs35960<br>711  | C/T | = | 0.07 | 39 | 7.83  |
| UTP3    | chr4:71555<br>705  | .               | A/G | PCLO    | chr7:82583<br>388   | rs10487<br>647  | A/G | G | 0.07 | 39 | 7.83  |
| MTTP    | chr4:10051<br>8283 | rs17533<br>489  | T/C | CALD1   | chr7:13464<br>2991  | rs11263<br>3425 | A/G | G | 0.00 | 21 | 0.42  |
| INTS12  | chr4:10660<br>4364 | rs34072<br>732  | A/G | EPHB6   | chr7:14256<br>3253  | rs81771<br>46   | T/G | G | 0.06 | 34 | 6.83  |
| DCHS2   | chr4:15518<br>0853 | rs13957<br>8314 | A/T | SH2D4A  | chr8:19221<br>726   | rs11160<br>0003 | G/A | A | 0.00 | 9  | 0.18  |
| FGB     | chr4:15549<br>0832 | rs4681          | C/T | GSR     | chr8:30557<br>599   | rs81909<br>76   | C/T | T | 0.00 | 10 | 0.2   |
| CTNND2  | chr5:10981<br>921  | rs13180<br>095  | A/T | ADAM18  | chr8:39564<br>352   | .               | G/A | = | 0.00 | 2  |       |
| NUP155  | chr5:37341<br>232  | .               | C/T | RB1C1   | chr8:53568<br>742   | .               | C/T | A | 0.15 | 75 | 15.06 |
| C5orf30 | chr5:10261<br>2166 | rs17155<br>192  | T/C | SPAG1   | chr8:10120<br>6391  | rs17335<br>870  | G/A | = | 0.12 | 62 | 12.48 |
| HSD17B4 | chr5:11887<br>7677 | rs12714         | C/T | ANKS6   | chr9:10153<br>3220  | rs64158<br>47   | C/T | C | 0.12 | 62 | 12.48 |
| FBXW11  | chr5:17130<br>3477 | rs10052<br>973  | A/G | NEK6    | chr9:12711<br>3155  | .               | C/G | = | 0.00 | 22 | 0.44  |
| DSP     | chr6:75857<br>63   | .               | A/C | NR6A1   | chr9:12730<br>0473  | .               | T/G | T | 0.00 | 22 | 0.44  |
| TFAP2D  | chr6:50697<br>021  | .               | T/C | TTF1    | chr9:13527<br>7523  | rs14734<br>1865 | C/T | = | 0.00 | 44 |       |
| PHIP    | chr6:79707<br>184  | rs19038<br>2214 | C/A | C9orf86 | chr9:13973<br>4151  | .               | C/G | C | 0.00 | 5  | 0.1   |
| GRIK2   | chr6:10213<br>4102 | rs14011<br>4474 | C/T | FBXW5   | chr9:13983<br>6554  | rs14996<br>7967 | T/C | = | 0.00 | 1  |       |
| SYNE1   | chr6:15258<br>9205 | rs11600<br>7471 | G/A | ARRD1   | chr9:14050<br>7366  | .               | T/C | A | 0.01 | 71 | 1.42  |
| RSPH3   | chr6:15939<br>8633 | rs37569<br>88   | T/C | ASCC1   | chr10:7388<br>7894  | rs79032<br>469  | T/A | = | 0.01 | 42 |       |
| MACC1   | chr7:20197<br>911  | rs11708<br>4218 | C/T | FAM178A | chr10:1026<br>76434 | .               | G/A | C | 0.01 | 74 | 1.48  |

Synonymous SNPs

Nonsynonymous SNPs

| Gene     | Chr:Pos            | RS ID           | Ref/Alt Alleles | Gene   | Chr:Pos             | RS ID           | Ref/Alt Alleles | dbSNP MAF | dbSNP P % |    |       |
|----------|--------------------|-----------------|-----------------|--------|---------------------|-----------------|-----------------|-----------|-----------|----|-------|
| GLI3     | chr7:42004<br>600  | rs34089<br>404  | G/A             | DCHS1  | chr11:6654<br>769   | .               | C/T             |           |           |    |       |
| HGF      | chr7:81388<br>042  | rs57456<br>35   | T/C             | OR4C16 | chr11:5534<br>0170  | rs61916<br>568  | A/C             | C         | 0.02      | 12 | 2.4   |
| PCLO     | chr7:82595<br>324  | rs99693<br>58   | C/T             | OR10   | chr11:5573<br>5518  | rs61896<br>165  | G/A             | A         | 0.03      | 19 | 3.81  |
| KPNA7    | chr7:98790<br>669  | rs77836<br>06   | G/C             | AG1    | chr11:5590<br>5025  | rs19479<br>24   | T/G             | G         | 0.06      | 30 | 6.03  |
| TSC22D4  | chr7:10007<br>2031 | rs78098<br>01   | T/C             | OR8J3  | chr11:5590<br>5025  | rs19479<br>24   | T/G             | G         | 0.06      | 30 | 6.03  |
| SMO      | chr7:12885<br>0875 | rs20166<br>07   | T/C             | TECTA  | chr11:1209<br>73430 | rs35507<br>522  | A/G             | G         | 0.04      | 20 | 4.13  |
| SLC37A3  | chr7:14006<br>9426 | rs11311<br>0951 | G/T             | CCDC15 | chr11:1248<br>57495 | .               | A/C             | =         | 0.04      | 13 | 7     |
| SLC25A37 | chr8:23429<br>329  | rs10473<br>84   | T/C             | PRDM10 | chr11:1297<br>72293 | .               | T/G             | T         | 0.00      | 22 | 0.44  |
| ADAMD1   | chr8:24256<br>512  | rs70052<br>58   | T/C             | EFCA   | chr12:3747<br>472   | rs11749<br>2949 | C/T             | G         | 0.15      | 78 | 15.63 |
| EC1      |                    |                 |                 | B4B    | chr12:6678<br>6091  | rs79703<br>87   | G/C             | =         | 0.15      | 63 | 3     |

|              |                    |                 |     |              |                     |                 |     |        |            |         |      |
|--------------|--------------------|-----------------|-----|--------------|---------------------|-----------------|-----|--------|------------|---------|------|
| ADAMD<br>EC1 | chr8:24261<br>518  | rs61731<br>545  | G/A | PTPR<br>B    | chr12:7101<br>6340  | rs72981<br>47   | C/T | T<br>= | 0.01<br>98 | 99      | 1.98 |
| INTS9        | chr8:28625<br>777  | .               | C/T | SLITR<br>K1  | chr13:8445<br>4655  | rs14562<br>8951 | A/C | C<br>= | 0.00<br>24 | 12      | 0.24 |
| EFCAB1       | chr8:49647<br>669  | .               | G/A | NOVA<br>1    | chr14:2691<br>8100  | .               | C/T |        |            |         |      |
| RB1CC<br>1   | chr8:53569<br>194  | rs16918<br>075  | C/T | TTLL5        | chr14:7624<br>9759  | rs14867<br>7697 | A/G | G<br>= | 0.00<br>62 | 31      | 0.62 |
| PUF60        | chr8:14489<br>8801 | .               | A/G | GPR1<br>32   | chr14:1055<br>17492 | .               | C/G |        |            |         |      |
| NFKBIL<br>2  | chr8:14566<br>5516 | rs23063<br>83   | T/C | C15orf<br>55 | chr15:3464<br>6769  | rs61737<br>334  | G/A | A<br>= | 0.02<br>3  | 11<br>5 | 2.3  |
| KIAA15<br>39 | chr9:35106<br>315  | rs18213<br>4491 | G/A | KIAA1<br>199 | chr15:8117<br>3308  | .               | G/A |        |            |         |      |
| AMBP         | chr9:11682<br>3774 | rs11210<br>9765 | G/A | CDH1<br>6    | chr16:6694<br>7064  | .               | T/C |        |            |         |      |
| PAPPA        | chr9:11913<br>0030 | rs38276<br>68   | A/G | GGT6         | chr17:4463<br>716   | rs62066<br>363  | G/A | A<br>= | 0.01<br>3  | 65      | 1.3  |
| TLN1         | chr9:35706<br>519  | .               | G/T | DNAH<br>2    | chr17:7721<br>315   | rs61749<br>477  | C/A | A<br>= | 0.00<br>7  | 35      | 0.7  |
| NET1         | chr10:5498<br>223  | rs77152<br>706  | T/C | SPAG<br>5    | chr17:2692<br>5578  | .               | A/G |        |            |         |      |
| FRMD4<br>A   | chr10:1373<br>5947 | rs22965<br>96   | A/G | SSH2         | chr17:2795<br>9034  | .               | T/C |        |            |         |      |
| FAM171<br>A1 | chr10:1525<br>5193 | .               | A/G | BCAS<br>3    | chr17:5878<br>6681  | rs34712<br>615  | A/G | G<br>= | 0.08<br>31 | 41<br>6 | 8.31 |
| MPP7         | chr10:2834<br>5418 | rs75802<br>203  | T/C | AZI1         | chr17:7917<br>6142  | rs11168<br>1839 | A/G | G<br>= | 0.02<br>1  | 10<br>5 | 2.1  |
| ERCC6        | chr10:5073<br>2681 | .               | A/G | RFNG         | chr17:8000<br>6980  | .               | G/A |        |            |         |      |
| P4HA1        | chr10:7476<br>7998 | rs34162<br>681  | C/G | KIAA1<br>772 | chr18:1908<br>5379  | .               | A/G |        |            |         |      |
| LDB3         | chr10:8844<br>6985 | rs76615<br>432  | T/C | DSG4         | chr18:2898<br>3565  | rs72292<br>52   | T/C | C<br>= | 0.02<br>28 | 11<br>4 | 2.28 |

Synonymous SNPs

Nonsynonymous SNPs

| Gene         | Chr:Pos             | RS ID           | Ref/Alt Alleles | Gene         | Chr:Pos            | RS ID           | Ref/Alt Alleles | dbSNP  | MAF        | dbSN P % |      |
|--------------|---------------------|-----------------|-----------------|--------------|--------------------|-----------------|-----------------|--------|------------|----------|------|
| CRTAC<br>1   | chr10:9966<br>4456  | rs70685<br>03   | T/C             | C19orf<br>28 | chr19:3547<br>315  | .               | C/G             |        |            |          |      |
| PYROX<br>D2  | chr10:1001<br>52825 | .               | G/A             | PPAN         | chr19:1022<br>1642 | rs11559<br>188  | A/G             | G<br>= | 0.06<br>75 | 33<br>8  | 6.75 |
| ADRA2<br>A   | chr10:1128<br>39026 | .               | A/G             | PRKC<br>SH   | chr19:1155<br>9907 | rs34351<br>170  | A/G             | G<br>= | 0.00<br>78 | 39       | 0.78 |
| TDRD1        | chr10:1159<br>50727 | rs75742<br>995  | A/G             | AKAP8        | chr19:1548<br>0981 | rs34063<br>092  | G/A             | A<br>= | 0.02<br>28 | 11<br>4  | 2.28 |
| PNLIP        | chr10:1183<br>14919 | rs11246<br>4025 | C/T             | NPHS<br>1    | chr19:3633<br>0277 | rs34736<br>717  | C/G             | G<br>= | 0.04<br>77 | 23<br>9  | 4.77 |
| FXC1         | chr11:6502<br>780   | rs11555<br>935  | C/A             | C5AR1        | chr19:4782<br>3038 | rs44671<br>85   | G/A             | G<br>= | 0.03<br>06 | 15<br>3  | 3.06 |
| ST5          | chr11:8751<br>577   | .               | A/G             | C5AR1        | chr19:4782<br>3871 | rs11880<br>097  | G/T             | G<br>= | 0.03<br>06 | 15<br>3  | 3.06 |
| OR5AS<br>1   | chr11:5579<br>8533  | rs17528<br>803  | A/C             | TRPM<br>4    | chr19:4967<br>1207 | rs11398<br>4787 | G/A             | A<br>= | 0.01<br>6  | 80       | 1.6  |
| OR8J3        | chr11:5590<br>4751  | rs19479<br>23   | T/C             | RSPH<br>1    | chr21:4389<br>7491 | .               | G/T             |        |            |          |      |
| NAALA<br>DL1 | chr11:6481<br>3918  | .               | C/T             | OSBP<br>2    | chr22:3128<br>9891 | rs34240<br>867  | A/G             | G<br>= | 0.00<br>6  | 30       | 0.6  |
| NAALA<br>DL1 | chr11:6481<br>4965  | .               | A/G             | ADSL         | chr22:4076<br>0978 | .               | T/C             |        |            |          |      |
| FOXMI        | chr12:2983<br>636   | rs28990<br>692  | A/G             | PPP1<br>R3F  | chrX:49137<br>916  | rs17148<br>347  | T/C             | C<br>= | 0.09<br>01 | 34<br>0  | 9.01 |
| PTPN6        | chr12:7061<br>221   | .               | T/C             | RPGR         | chrX:38182<br>130  | rs11163<br>1988 | T/C             | C<br>= | 0.02<br>54 | 96       | 2.54 |
| ITGA5        | chr12:5479<br>5410  | rs73322<br>228  | A/G             |              |                    |                 |                 |        |            |          |      |
| BAZ2A        | chr12:5700<br>3964  | rs22305<br>80   | T/A             |              |                    |                 |                 |        |            |          |      |
| MYL2         | chr12:1113<br>53556 | rs23016<br>10   | A/G             |              |                    |                 |                 |        |            |          |      |

|        |            |         |     |
|--------|------------|---------|-----|
| SFRS8  | chr12:1322 | rs34754 | T/C |
|        | 10063      | 096     |     |
| NARG1  | chr13:4190 | rs38128 | T/C |
| L      | 2939       | 96      |     |
| DIAPH3 | chr13:6059 | .       | T/C |
|        | 0255       |         |     |
| TEP1   | chr14:2084 | rs22280 | G/A |
|        | 9169       | 39      |     |
| DHRS2  | chr14:2410 | rs11618 | A/G |
|        | 9065       | 9534    |     |
| DHRS2  | chr14:2411 | rs11204 | C/T |
|        | 4054       | 4307    |     |
| LRRC16 | chr14:2453 | rs11260 | C/A |
| B      | 4474       | 6230    |     |
| TINF2  | chr14:2470 | rs10141 | C/T |
|        | 9351       | 326     |     |
| SSTR1  | chr14:3867 | .       | G/C |
|        | 9302       |         |     |
| FERMT  | chr14:5341 | rs61741 | G/C |
| 2      | 7158       | 989     |     |

Synonymous SNPs

Nonsynonymous SNPs

| Gene     | Chr:Pos    | RS ID   | Ref/Alt Alleles | Gene | Chr:Pos | RS ID | Ref/Alt Alleles | dbSNP MAF | dbSNP % |
|----------|------------|---------|-----------------|------|---------|-------|-----------------|-----------|---------|
| GALNTL1  | chr14:6979 | .       | C/T             |      |         |       |                 |           |         |
|          | 2114       |         |                 |      |         |       |                 |           |         |
| KIAA1199 | chr15:8117 | rs35541 | G/A             |      |         |       |                 |           |         |
|          | 2064       | 581     |                 |      |         |       |                 |           |         |
| TM6SF1   | chr15:8378 | .       | C/T             |      |         |       |                 |           |         |
|          | 8350       |         |                 |      |         |       |                 |           |         |
| ACAN     | chr15:8938 | .       | A/C             |      |         |       |                 |           |         |
|          | 2027       |         |                 |      |         |       |                 |           |         |
| ANPEP    | chr15:9034 | rs11354 | A/T             |      |         |       |                 |           |         |
|          | 8682       | 7384    |                 |      |         |       |                 |           |         |
| UNC45A   | chr15:9148 | rs80345 | C/T             |      |         |       |                 |           |         |
|          | 6305       | 51      |                 |      |         |       |                 |           |         |
| CDH16    | chr16:6694 | .       | C/T             |      |         |       |                 |           |         |
|          | 6646       |         |                 |      |         |       |                 |           |         |
| ZNF469   | chr16:8849 | rs74384 | G/C             |      |         |       |                 |           |         |
|          | 6452       | 633     |                 |      |         |       |                 |           |         |
| MYO1C    | chr17:1386 | rs61756 | C/G             |      |         |       |                 |           |         |
|          | 915        | 682     |                 |      |         |       |                 |           |         |
| MYBBP1A  | chr17:4455 | rs14500 | T/C             |      |         |       |                 |           |         |
|          | 763        | 6324    |                 |      |         |       |                 |           |         |
| DNAH2    | chr17:7720 | rs78005 | C/T             |      |         |       |                 |           |         |
|          | 920        | 021     |                 |      |         |       |                 |           |         |
| MSL1     | chr17:3828 | rs28526 | C/T             |      |         |       |                 |           |         |
|          | 2624       | 298     |                 |      |         |       |                 |           |         |
| CCR7     | chr17:3871 | rs22290 | T/C             |      |         |       |                 |           |         |
|          | 1222       | 95      |                 |      |         |       |                 |           |         |
| SPOP     | chr17:4767 | rs11380 | G/A             |      |         |       |                 |           |         |
|          | 9280       | 8176    |                 |      |         |       |                 |           |         |
| KRT14    | chr17:3974 | rs75795 | T/C             |      |         |       |                 |           |         |
|          | 0629       | 684     |                 |      |         |       |                 |           |         |
| DAZAP1   | chr19:1430 | rs11377 | T/C             |      |         |       |                 |           |         |
|          | 303        | 8676    |                 |      |         |       |                 |           |         |
| FEM1A    | chr19:4792 | rs73919 | A/G             |      |         |       |                 |           |         |
|          | 697        | 322     |                 |      |         |       |                 |           |         |
| PRKCSH   | chr19:1155 | rs13914 | T/C             |      |         |       |                 |           |         |
|          | 9801       | 4555    |                 |      |         |       |                 |           |         |
| MAN2B1   | chr19:1277 | .       | A/G             |      |         |       |                 |           |         |
|          | 4194       |         |                 |      |         |       |                 |           |         |
| KIAA0892 | chr19:1945 | .       | G/A             |      |         |       |                 |           |         |
|          | 6169       |         |                 |      |         |       |                 |           |         |
| ATP1A3   | chr19:4247 | rs61733 | A/G             |      |         |       |                 |           |         |
|          | 4639       | 017     |                 |      |         |       |                 |           |         |
| FGF21    | chr19:4926 | .       | C/A             |      |         |       |                 |           |         |
|          | 0260       |         |                 |      |         |       |                 |           |         |
| MUC16    | chr19:8982 | rs78717 | A/G             |      |         |       |                 |           |         |
|          | 212        | 907     |                 |      |         |       |                 |           |         |

|            |                    |                |     |
|------------|--------------------|----------------|-----|
| HOMER<br>3 | chr19:1904<br>2387 | rs57792<br>670 | A/G |
| JAG1       | chr20:1063<br>7057 | rs10485<br>741 | T/C |
| NCOA6      | chr20:3332<br>9689 | .              | C/T |

Synonymous SNPs

| Gene          | Chr:Pos            | RS ID         | Ref/Alt Alleles |
|---------------|--------------------|---------------|-----------------|
| C20orf1<br>18 | chr20:3551<br>7690 | .             | C/T             |
| SLC12A<br>5   | chr20:4466<br>5946 | rs37465<br>19 | T/C             |
| AGPAT<br>3    | chr21:4538<br>7870 | .             | A/G             |

Nonsynonymous SNPs

| Gene | Chr:Pos | RS ID | Ref/Alt Alleles | dbSNP MAF | dbSNP % |
|------|---------|-------|-----------------|-----------|---------|
|------|---------|-------|-----------------|-----------|---------|

Supplementary Table 2. Exome SNPs fixed for a derived allele in humans (and not variable in dbSNP) and the ancestral allele in Neandertals and Denisovans

| Synonymous SNPs |                 |                   | Nonsynonymous SNPs |                      |               |
|-----------------|-----------------|-------------------|--------------------|----------------------|---------------|
| Gene            | Chr:Pos (1)     | Ref/Alt Bases (2) | Gene               | Chr:Pos              | Ref/Alt Bases |
| FHL3            | chr1:38464668   | A/G               | SPAG17             | chr1:118558632       | T/C           |
| TLL7            | chr1:84387062   | T/C               | SPAG17             | chr1:118634297       | A/C           |
| VCAM1           | chr1:101196855  | C/T               | SLC27A3            | chr1:153751869       | G/T           |
| SPAG17          | chr1:118558666  | G/A               | ZBTB24             | chr6:109802500       | C/G           |
| ARHGEF2         | chr1:155934849  | A/G               | <b>AHR</b>         | <b>chr7:17375392</b> | <b>T/C</b>    |
| FCRL3           | chr1:157665381  | A/G               | DNAH11             | chr7:21892230        | T/C           |
| CD1D            | chr1:158153772  | G/A               | ADAM18             | chr8:39564352        | G/A           |
| POLN            | chr4:2129905    | C/T               | RB1CC1             | chr8:53568742        | C/T           |
| BOD1L           | chr4:13603037   | T/C               | NEK6               | chr9:127113155       | C/G           |
| UTP3            | chr4:71555705   | A/G               | NR6A1              | chr9:127300473       | T/G           |
| NUP155          | chr5:37341232   | C/T               | C9orf86            | chr9:139734151       | C/G           |
| DSP             | chr6:7585763    | A/C               | ARRDC1             | chr9:140507366       | T/C           |
| TFAP2D          | chr6:50697021   | T/C               | FAM178A            | chr10:102676434      | G/A           |
| INTS9           | chr8:28625777   | C/T               | DCHS1              | chr11:6654769        | C/T           |
| EFCAB1          | chr8:49647669   | G/A               | CCDC15             | chr11:124857495      | A/C           |
| PUF60           | chr8:144898801  | A/G               | PRDM10             | chr11:129772293      | T/G           |
| TLN1            | chr9:35706519   | G/T               | NOVA1              | chr14:26918100       | C/T           |
| FAM171A1        | chr10:15255193  | A/G               | GPR132             | chr14:105517492      | C/G           |
| ERCC6           | chr10:50732681  | A/G               | KIAA1199           | chr15:81173308       | G/A           |
| PYROXD2         | chr10:100152825 | G/A               | CDH16              | chr16:66947064       | T/C           |
| ADRA2A          | chr10:112839026 | A/G               | SPAG5              | chr17:26925578       | A/G           |
| ST5             | chr11:8751577   | A/G               | SSH2               | chr17:27959034       | T/C           |
| NAALADL1        | chr11:64813918  | C/T               | RFNG               | chr17:80006980       | G/A           |
| NAALADL1        | chr11:64814965  | A/G               | KIAA1772           | chr18:19085379       | A/G           |
| Synonymous SNPs |                 |                   | Nonsynonymous SNPs |                      |               |
| Gene            | Chr:Pos (1)     | Ref/Alt Bases (2) | Gene               | Chr:Pos              | Ref/Alt Bases |
| PTPN6           | chr12:7061221   | T/C               | C19orf28           | chr19:3547315        | C/G           |
| DIAPH3          | chr13:60590255  | T/C               | RSPH1              | chr21:43897491       | G/T           |
| SSTR1           | chr14:38679302  | G/C               | ADSL               | chr22:40760978       | T/C           |
| GALNTL1         | chr14:69792114  | C/T               |                    |                      |               |
| TM6SF1          | chr15:83788350  | C/T               |                    |                      |               |
| ACAN            | chr15:89382027  | A/C               |                    |                      |               |
| CDH16           | chr16:66946646  | C/T               |                    |                      |               |
| MAN2B1          | chr19:12774194  | A/G               |                    |                      |               |
| KIAA0892        | chr19:19456169  | G/A               |                    |                      |               |
| FGF21           | chr19:49260260  | C/A               |                    |                      |               |
| NCOA6           | chr20:33329689  | C/T               |                    |                      |               |
| C20orf118       | chr20:35517690  | C/T               |                    |                      |               |

AGPAT3

chr21:45387870

A/G

*1: Chromosome Number:Reference Base Position in Chromosome*

*2: Reference/Alternate Bases at specified chromosome position*



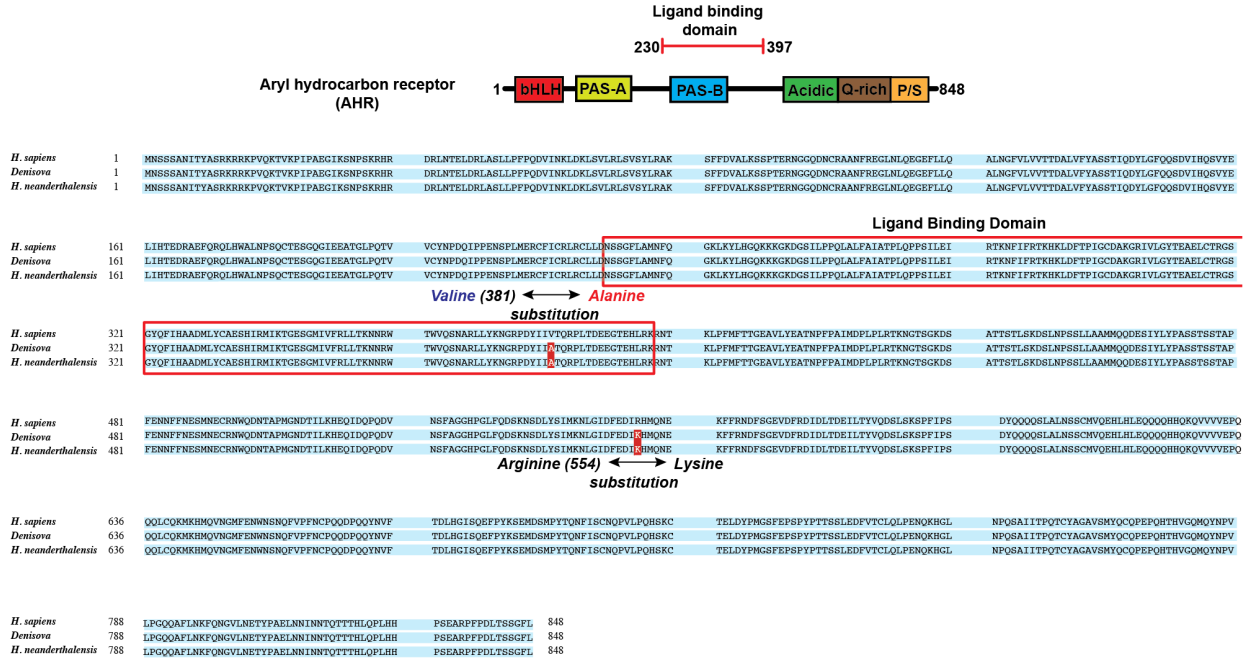

Supplementary fig. 1. Schematic representation of *H. sapiens* AHR domain organization highlighting the position of the ligand binding domain (residues 230-397). Amino acid sequences for hominin (*H. sapiens*, *H. neanderthalensis* and Denisova) AHR were aligned using the NCBI protein-protein blast (blastp) algorithm. AHR ligand binding domain is indicated by red border. Non-synonymous amino acid variants A ↔ V381 and R ↔ K554 are highlighted in red.

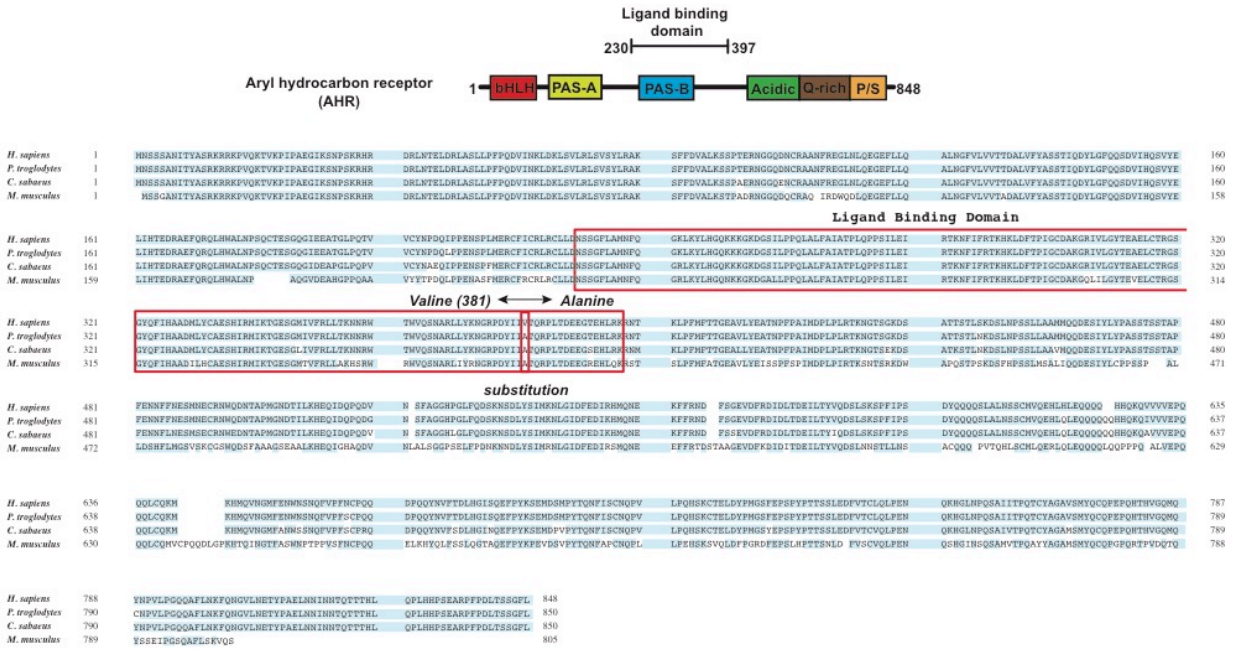

Supplementary fig. 2. Schematic representation of *H. sapiens* AHR domain organization highlighting the position of the ligand binding domain (residues 230-397). Amino acid sequences for hominin (*H. sapiens*, *P. troglodytes*, *C. sabaeus* and *M. musculus*) AHR were aligned using the NCBI protein-protein blast (blastp) algorithm. AHR ligand binding domain is indicated by red border. Non-synonymous amino acid variants A↔V381 is highlighted in red.

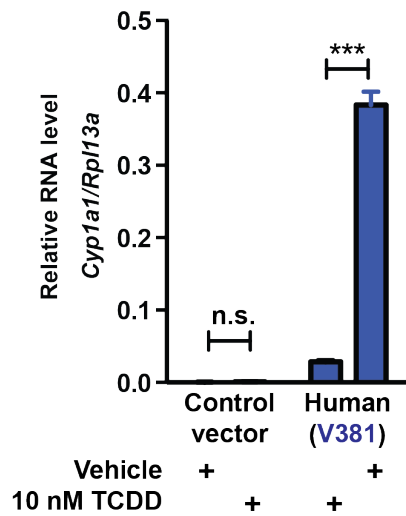

Supplementary fig. 3. TCDD fails to induce *Cyp1a1* in BP8 cells in the absence of ectopic AHR expression. BP8 cells were transfected with either a control or human AHR expressing plasmid, after 24 h cells were treated with TCDD for 4 h. *Cyp1a1* mRNA levels were measured by qRT-PCR. Data were analyzed using one-way ANOVA followed by Tukey's multiple-comparisons test. \*\*\*< 0.001.

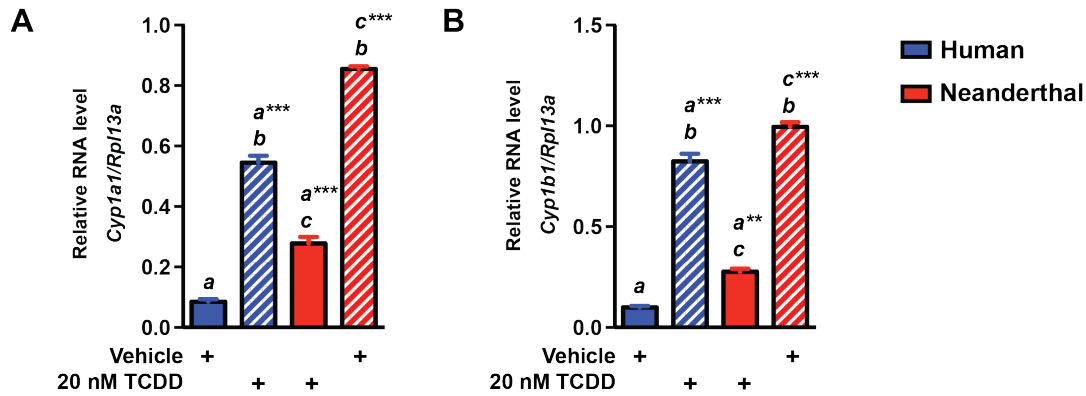

Supplementary fig. 4. At a saturating dose of TCDD the ectopic expression of the Neanderthal and human AHR in BP8 cells results in similar levels of *Cyp1a1* and *Cyp1b1*. BP8 cells were transfected with either a Neanderthal or human AHR expressing plasmid, after 24 h cells were treated with TCDD for 4 h. *Cyp1a1* mRNA levels were measured by qRT-PCR. Data were analyzed using one-way ANOVA followed by Tukey's multiple-comparisons test. \*\*\* $P < 0.001$ , \*\*  $P < 0.01$ . Alphabetical characters indicate statistical comparisons between groups.

Codon optimized green monkey AHR cDNA sequence

ATGAACTCCAGCTCCGCCAACATTACTTACGCCAGCAGGAAAAGAAGAAAGCCCGTCCAGAAGACAGTGAAGCCA  
ATCCCAGCCGAAGGCATCAAATCCAATCCTTCTAAGCGGCACAGAGACAGGCTGAACACAGAGCTGGATCGACTG  
GCATCCCTGCTGCCATTCCCTCAGGACGTGATTAACAAACTGGATAAGCTGTTCAGTGTGAGACTGTCCGTCTCT  
TACCTGAGGGCAAAAAGCTTCTTTGACGTGGCCCTGAAGAGCTCCCCAGCAGAGCGAAAACGGAGGACAGGAAAAT  
TGCAGGGCCGCTAACTTTTCGCGAAGGACTGAATCTGCAGGAGGGCGAATTCCTGCTGCAGGCTCTGAACGGGTTT  
GTGCTGGTGGTCACCACAGACGCTCTGGTCTTCTACGCATCTAGTACCATCCAGGACTATCTGGGATTTTCAGCAG  
TCAGATGTGATCCACCAGAGCGTCTATGAGCTGATTTCATACCCGAGGATCGAGCCGAATTCAGCGGCAGCTGCAT  
TGGGCTCTGAATCCCTCTCAGTGCACAGAGAGTGGGCAGGGAATCGATGAAGCCCTGGACTGCCTCAGCCAGTG  
GTCTGTTACAATGCTGAGCAGATCCCCCTGAGAACAGCCCTTTTCATGGAAAGGTGCTTTATTTGTGCGCTGCGA  
TGCCTGCTGGATAAATCAAGCGGCTTCTGGCCATGAACTTTTCAGGGGCGACTGAAGTATCTGCACGGACAGAAG  
AAAAAGGGAAAGGACGGCTCTATCCTGCCACCCCAGCTGGCTCTGTTTCGCCATTGCTACACCTCTGCAGCCTCCA  
AGCATCCTGGAGATTTCGCACAAAGAACTTCATCTTTTCGAACTAAGCATAAGCTGGACTTTACCCCAATCGGATGC  
GATGCAAAGGGCAGAATTGTGCTGGGGTACACCGAGGCCGAATGTGCACAAGGGGCTCTGGCTACCAGTTCATC  
CACGCAGCCGATATGCTGTATTGTGCCGAGAGCCATATCAGAATGATCAAGACCCGGGAATCCGGACTGATCGTG  
TTCCGGCTGCTGACTAAGAACAATAGATGGACCTGGGTCCAGTCCAATGCTAGGCTGCTGTACAAGAACGGCAGA  
CCCGACTATATCATTGCAACACAGAGGCCTCTGACTGATGAGGAAGGGAGCGAGCACCTGCGGAAAAGAAAACATG  
AAGCTGCCCTTCATGTTTACTACCGGCGAGGCCCTGCTGTATGAAGCTACCAATCCATTCCCCGCAATCATGGAC  
CCTCTGCCACTGCGCACCAAAAACGGCACAAGCGAAAAGGACTCCGCCACAAAGTCTACCCTGAATAAGGATAGT  
CTGAACCCATCCTCTCTGCTGGCTGCAGTGCAGCAGGATGAGTCCATCTACCTGTATCCAGCTAGTTCAACT  
AGTCCACCGCACCTTCGAAAACAATTTCTGAATGAGAGCATGAGTGAATGCCGAATTTGGGAAGACAACACA  
GCTCCCATGGGCAATGATACTATCCTGAAGCACGAGCAGATTGACCAGCCCAGGATGTGAACAGCTTCGCAGGA  
GGCCATCTGGGGCTGTTTTCAGGACAGTAAAAATTCAGATCTGTACTCCATCATGAAGAACCTGGGAATCGACTTC  
GAGGATATCAAGCACATGCAGAATGAAAAGTTCTTTTCGAAACGACTTCAGCAGTGAGGTGGATTTTTCGGGACATC  
GATCTGACAGACGAAATTTCTGACTTACATTCAGGATAGTCTGTCAAAAAGCCCTTCATCCCCTCCGACTATCAG  
CAGCAGCAGTCTCTGGCCCTGAATTTCTAGTTGTATGGTGCAGGAGCACCTGCAGCTGGAACAGCAGCAGCAGCAG  
CAGCACCATCAGAAGCAGGCAGTGGTTCGAGCCCAGCAGCAGCTGTGCCAGAAAATGAAGCATATGCAAGTGAAT  
GGCATGTTTCGCTAACTGGTCCAGTAACCAGTTCGTTCCATTTTCATGTCCAGACAGGACCCTCAGCAGTACAAC  
GTGTTCTCAGATCTGCACGGGATCAATCAGGAGTTTTCTTACAAAAGTGAATGGACCCAGTGCCATATACACAG  
AACTTCATCTCTTGCAACCAGCCTGTGCTGCCACAGCATAGTAAGTGTACTGAGCTGGACTACCCAATGGGGAGC  
TATGAACCCCTCCCCTTATCCAACCACATCAAGCCTGGAGGATTTTGTGACTTGCCTGCAGGTCCCCGAAAATCAG  
AAACAGGGCTGAACCCACAGTCCGCCATCGTGACACCCCAGACTTGCTACGCAGGAGCCATGTCTATGTATCAG  
TGTCAGCCCGGCTCAGCACACCCATGTGGGACAGATGCAGTATAAACCCTGCTGCCTGGCAGCAGGCCTTTC  
CTGAATAAGTTTTCAGAACGGCGTGCTGAATGAGACCTACCCTGCTGAACCTGAACAATATCAACAATACAGGCC  
ACCACACATCTGCAGCCCCTGCACCATCCAAGCGAAGCAAGACCATTTCCCGACCTGACATCATCTGGGTTCTCTG  
TAA

Codon optimized chimpanzee AHR cDNA sequence

ATGAACTCCAGCTCCGCCAACATTACTTACGCCAGCAGGAAAAGAAGAAAGCCCGTCCAGAAGACAGTGAAGCCA  
ATCCCAGCCGAAGGCATCAAATCCAATCCTTCTAAGCGGCACAGAGACAGGCTGAACACAGAGCTGGATCGACTG  
GCATCCCTGCTGCCATTCCCTCAGGACGTGATTAACAAACTGGATAAGCTGTTCAGTGTGAGACTGTCCGTCTCT  
TACCTGAGGGCAAAAAGCTTCTTTGACGTGGCCCTGAAGAGCTCCCCAACCAGAGCGAAAACGGAGGACAGGATAAT  
TGCAGGGCCGCTAACTTTTCGCGAAGGACTGAATCTGCAGGAGGGCGAATTCCTGCTGCAGGCTCTGAACGGGTTT  
GTGCTGGTGGTCACCACAGACGCTCTGGTCTTCTACGCATCTAGTACCATCCAGGACTATCTGGGATTTTCAGCAG  
TCAGATGTGATCCACCAGAGCGTCTATGAGCTGATTTCATACCCGAGGATCGAGCCGAATTCAGCGGCAGCTGCAT  
TGGGCTCTGAATCCCTCTCAGTGCACAGAGAGTGGGCAGGGAATCGAGGAAGCCACTGGACTGCCTCAGACCGTG  
GTCTGTTACAATCCAGACCAGCTGCCCCCTGAGAACAGCCCTCTGATGGAAAGGTGCTTTATTTGTGCGCTGCGA  
TGCCTGCTGGATAAATCAAGCGGCTTCTGGCCATGAACTTTTCAGGGGAAACTGAAGTATCTGCACGGACAGAAG  
AAAAAGGGAAAGGACGGCTCTATCCTGCCACCCCAGCTGGCTCTGTTTCGCCATTGCTACACCTCTGCAGCCTCCA  
AGCATCCTGGAGATTTCGCACAAAGAACTTCATCTTTTCGAACTAAGCATAAGCTGGACTTTACCCCAATCGGATGC  
GATGCAAAGGGCAGAATTGTGCTGGGGTACACCGAGGCCGAATGTGCACAAGGGGCTCTGGCTACCAGTTCATC  
CACGCAGCCGATATGCTGTATTGTGCCGAGAGCCATATCAGAATGATCAAGACCCGGGAATCCGGAAATGATCGTG  
TTCCGGCTGCTGACTAAGAACAATAGATGGACCTGGGTCCAGTCCAATGCTAGGCTGCTGTACAAGAACGGCAGA  
CCCGACTATATCATTGCAACACAGAGGCCTCTGACTGATGAGGAAGGGACCGAGCACCTGCGGAAAAGAAAACACT  
AAGCTGCCCTTCATGTTTACTACCGGCGAGGCCGTGCTGTATGAAGCTACCAATCCATTCCCCGCAATCATGGAC

CCTCTGCCACTGCGCACCAAAAACGGCACAAGCGGGAAGGACTCCGCCACAACCTTCTACCCTGAATAAGGATAGT  
CTGAACCCATCCTCTCTGCTGGCTGCAATGATGCAGCAGGATGAGTCCATCTACCTGTATCCAGCTAGTTCAACT  
AGCTCCACCGCACCTTCGAAAACAATTTCTTTAATGAGAGCATGAACGAATGCCGGAATTGGCAGGACAACACA  
GCTCCCATGGGCAATGATACTATCCTGAAGCACGAGCAGATTGACCAGCCCAGGATGGCAACAGCTTCGCAGGA  
GGCCATCCTGGGCTGTTTTAGGACAGTAAAAATTCAGATCTGTACTCCATCATGAAGAACCTGGGAATCGACTTC  
GAGGATATCAAGCACATGCAGAATGAAAAGTTCTTTGAAAACGACTTCAGCGGGCAGGTTGGATTTTCGGGACATC  
GATCTGACAGACGAAATTCGACTTACGTCCAGGATAGTCTGTCAAAAAGCCCCTTCATCCCCTCCGACTATCAG  
CAGCAGCAGTCTCTGGCCCTGAATTTCTAGTTGTATGGTGCAGGAGCACCTGCAGCTGGAACAGCAGCAGCAGCAG  
CAGCACCATCAGAAGCAGATTGTGGTCGAGCCCCAGCAGCAGCTGTGCCAGAAAATGAAGCATATGCAAGTGAAT  
GGCATGTTGAAAACCTGGAATAGTAACCAGTTCGTCCCATTTTCATGTCCCAGCAGGACCCTCAGCAGTACAAC  
GTGTTACCGATCTGCACGGGATCAGCCAGGAGTTTTCTTACAAAAGTGAATGGACTCAATGCCATATACACAG  
AACTTCATCTCTTGCAACCAGCCTGTGCTGCCACAGCATAGTAAGTGTACTGAGCTGGACTACCCAATGGGGAGC  
TTCGAACCCTCCCCTTATCCAACCACATCAAGCCTGGAGGATTTTGTGACTTGCCTGCAGCTGCCCGAAAATCAG  
AAACACGGGCTGAACCCACAGTCCGCCATCATTACACCCCAGACTTGCTACGCAGGAGCCGTGTCTATGTATCAG  
TGTCAGCCCAGCCTCAGCACACCCATGTGGGACAGATGCAGTGTAAACCCGTCCTGCCTGGACAGCAGGCCTTC  
CTGAATAAGTTTTCAGAACGGCGTGCTGAATGAGACCTACCCTGTGAACTGAACAATATCAACAATACACAGACT  
ACCACACATCTGCAGCCCCTGCACCATCCAAGCGAAGCAAGACCATTTCCCGACCTGACATCATCTGGGTTCTCTG  
TAA

Codon optimized human AHR cDNA sequence

ATGAACAGCAGCAGCGCTAACATCACCTACGCTAGCCGAAAACGGCGGAAGCCCGTGCAGAAAACCGTGAAGCCC  
ATCCCCGCTGAAGGCATCAAAAGCAACCCCAGCAAACGGCACCGGGATCGGCTGAACACCGAACTGGATCGGCTG  
GCTAGCCTGCTCCCCTTCCCCCAGGATGTGATCAACAAGCTGGATAAACTGAGCGTGCTGCGGCTCAGCGTGAGC  
TACCTGCGGGCCAAGAGCTTCTTCGATGTGGCTCTGAAAAGCAGCCCCACCGAACGGAACGGCGGCCAGGATAAC  
TGCCGGGCTGCTAACTTCCGGGAAGGCCTGAACCTGCAGGAAGGCGAATTCCTGCTCCAGGCTCTGAACGGCTTC  
GTGCTGGTGGTGACCACCGATGCTCTGGTGTCTACGCTAGCAGCACCATCCAGGATTACCTGGGCTTCCAGCAG  
AGCGATGTGATCCACCAGAGCGTGTACGAACTGATCCACACCGAAGATCGGGCTGAATTCAGCGGCAGCTGCAC  
TGGGCTCTGAACCCAGCCAGTGCACCGAAAAGCGGCCAGGGCATCGAAGAAGCTACCGGCCTCCCCAGACCGTG  
GTGTGCTACAACCCGATCAGATCCCCCCCCGAAAACAGCCCCCTGATGGAACGGTGCTTCATCTGCCGGCTGCGG  
TGCCTGCTCGATAACAGCAGCGGCTTCTGGCCATGAACTTCAGGGCAAGCTGAAGTACCTGCACGGCCAGAAA  
AAGAAAGGCAAGATGGCAGCATCCTGCCCCCCCAGCTGGCTCTGTTCGCTATCGCTACCCCCCTGCAGCCCCC  
AGCATCTCGAAAATCCGGACCAAAAACCTTCACTTCCGGACCAACAAAACAACTGGACTTCACCCCCCTCGGCTGC  
GATGTAAAGGCGGATCGTGTGGCTACACCAAGCTGAACTGTGCACACGGGGCAGCGGCTACCAGTTCATC  
CACGCTGCTGATATGCTGTACTGCGCCGAGAGCCATCCGGATGATCAAGACCGGCGAAAAGCGGCATGATCGTG  
TTCCGGCTGCTCACCAAAAACAACCGGTGGACCTGGGTGCAGAGCAACGCTCGGCTGCTCTACAAAACCGCCGG  
CCCGATTACATCATCGTGACCCAGCGGCCCTGACCGATGAAGAAGGCACCGAGCACCTGCGGAAAACGGAACACC  
AAGCTGCCCTTCATGTTACACCACCGGCGAAGCTGTGCTGTACGAAGCCACCAACCCCTTCCCCGCTATCATGGAT  
CCCCTGCCCCTGCGGACCAAAAACGGCACAGCGGCAAAGATAGCGCTACCACCAGCACCTGAGCAAGGATAGC  
CTCAACCCAGCAGCCTCCTGGCTGCCATGATGCAGCAGGATGAGAGCATCTACCTCTACCCCGCTAGCAGCACC  
AGCAGCACCGCCCCCTTCGAAAACAATTTCTTCAACGAAAGCATGAACGAATGCCGGAACTGGCAGGATAACACC  
GCCCCATGGGCAACGATAACCATCCTGAAACACGAGCAGATCGACCAGCCCCAGGATGTGAACAGCTTCGCTGGC  
GGCCACCCCGGCCTCTTCCAGGATAGCAAAAACAGCGACCTGTACAGCATCATGAAAAACCTGGGCATCGATTTT  
GAAGACATCCGGCACATGCAGAACGAAAATTTCTTCCGGAACGATTTTCAGCGGGCAAGTGGACTTCCGGGACATC  
GACCTGACCGATGAAATCCTGACCTACGTGCAGGATAGCTGAGCAAGAGCCCCTTCATCCCCAGCGATTACCAG  
CAGCAGCAGAGCCTGGCTCTGAACAGCAGCTGCATGGTGCAGGAACACCTGCACCTGGAACAGCAGCAGCAGCAG  
CACCAGAAAACAGGTGGTGGTGAACCCAGCAGCAGCTGTGCCAGAAGATGAAGCACATGCAGGTGAACGGCATG  
TTCGAAAACCTGGAACAGCAACCAGTTCGTGCCCTTCAACTGCCCCAGCAGGACCCCGCAGTACAACGTGTTT  
ACCGATCTGCACGGCATCAGCCAGGAGTTCCCTTACAAAAGCGAAAATGGATAGCATGCCCTACACCCAGAATTC  
ATCAGCTGCAACCAGCCCGTGTGCCCCAGCACAGCAAATGCACCGAGCTGGATTACCCCATGGGCAGCTTCGAA  
CCCAGCCCCTACCCACCACCAGCAGCCTGGAAGATTTCTGTGACCTGCCTGCAGCTGCCCGAAAACAGAAAAC  
GGCCTGAACCCCCAGAGCGCTATCATCACCCCCAGACCTGCTACGCTGGCGCTGTGAGCATGTACCAGTGCCAG  
CCCGAACCCAGCACACCCACGTGGGCCAGATGCAGTACAACCCCGTGTGCCCCGGCCAGCAGGCCTTCCTGAAC  
AAGTTCCAGAACGGCGTGCTGAACGAAACCTACCCCGTGAACCTGAACAACATCAACAACACCCAGACCACCACC  
CACCTGCAGCCCCTGCACCACCCAGCGAAGCTCGGCCCTTCCCGATCTGACCAGCAGCGGCTTCCTGTGA

Supplementary fig. 5. Codon optimized cDNA sequences for the green monkey, chimpanzee and human AHR.
